# Supplementary material for: Tracking westerly wind directions over Europe since the middle Holocene
Source: PubMed Central journal article supplement (PMC9772192; doi:10.1038/s41467-022-34952-9), 2022-12-21
Supplement: 41467_2022_34952_MOESM2_ESM.pdf [file 41467_2022_34952_MOESM2_ESM.pdf]

## **Description of Additional Supplementary Files:**

**Supplementary Data 1:** BA14-1 and BA18-4 U-Th dating report

**Supplementary Data 2:** Data of BA14-1 and BA18-4  $\delta^{18}\text{O}$  values,  $\Delta^{18}\text{O}$

**Supplementary Data 3:** Data of BA14-1 and BA18-4 Sr/Ca ratios

**Supplementary Movie 1:** Thirty-year window of running correlation between winter (December-February) precipitation and NAO index during 1836-2014 C.E based on NCAR/NCEP

Reanalysis v3 (<https://www.esrl.noaa.gov/>)

Maps were generated using KNMI climate explorer (<https://climexp.knmi.nl/>).
